# Supplementary material for: One-step hydrothermal fabrication of strongly coupled Co3O4 nanosheets–reduced graphene oxide for electrochemical capacitors
Source: Royal Society of Chemistry journal article supplement (doi:10.1039/c4ra00762j), 2014-01-01
Supplement: c4ra00762j1.pdf [file c4ra00762j1.pdf]

## Electronic Supplementary Information

---

### **One-step hydrothermal fabrication of strongly coupled Co<sub>3</sub>O<sub>4</sub> nanosheets-reduced graphene oxide towards electrochemical capacitors**

*Changzhou Yuan,<sup>\*a, b</sup> Longhai Zhang,<sup>a</sup> Linrui Hou,<sup>a</sup> Gang Pang,<sup>a</sup> and Won-Chun Oh<sup>\*c</sup>*

<sup>a</sup> School of Materials Science & Engineering, Anhui University of Technology, Ma'anshan, 243002, P.R. China

<sup>b</sup> Key Laboratory of Colloid and Interface Chemistry (Shandong University), Ministry of Education, Ji'nan, 250100, P.R. China

<sup>c</sup> Department of Advanced Materials Science & Engineering, Hanseo University, Seosan-si, Chungnam-do, 356-706, Korea

Email: [ayuan cz@163.com](mailto:ayuan cz@163.com) (C. Yuan); [wc\\_oh@hanseo.ac.kr](mailto:wc_oh@hanseo.ac.kr) (W. Oh)

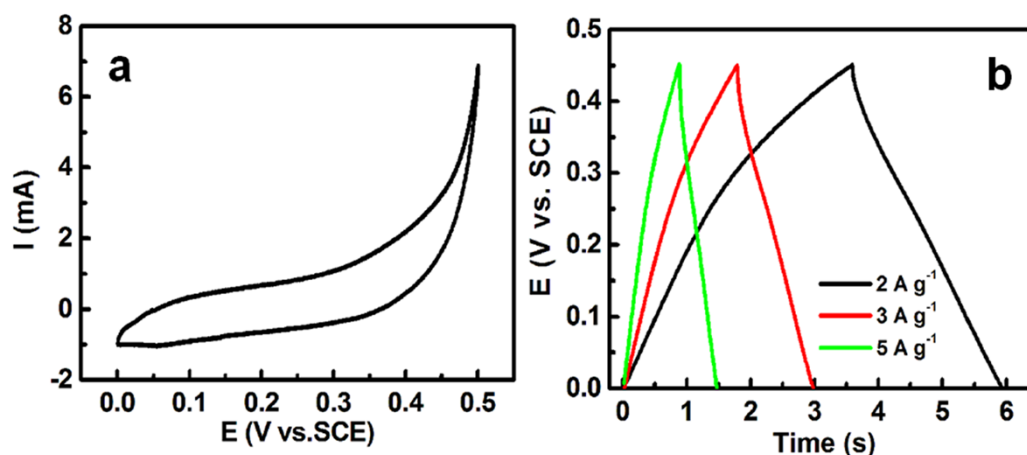

**Fig. S1** (a) CV curve ( $10 \text{ mV s}^{-1}$ ) and (b) charge-discharge plots of the r-GO electrode at various current densities as indicated

As seen in the Fig. S1a, the small areas integrated below the zero-current line at a scan rate of  $10 \text{ mV s}^{-1}$ , suggesting the low SC of the as-fabricated rGO electrode. Of particularly note, a serious polarization phenomenon above  $\sim 0.35 \text{ V}$  is presented, which is related to the oxygen evolution in such electrochemical window. Fig S1b demonstrates the typical charge-discharge plots of the rGO electrode at various current densities as indicated. The obvious linear charge-discharge curves indicate the typical electrical double-layer capacitance for the rGO electrode. And the SCs of 11, 8 and  $6 \text{ F g}^{-1}$  can be calculated for rGO electrode at current densities of 2, 3 and  $5 \text{ A g}^{-1}$ . Furthermore, the low coulombic efficiency of  $\sim 64\%$  was observed at  $2 \text{ A g}^{-1}$  for the rGO electrode, owing to the existence of obvious polarization.

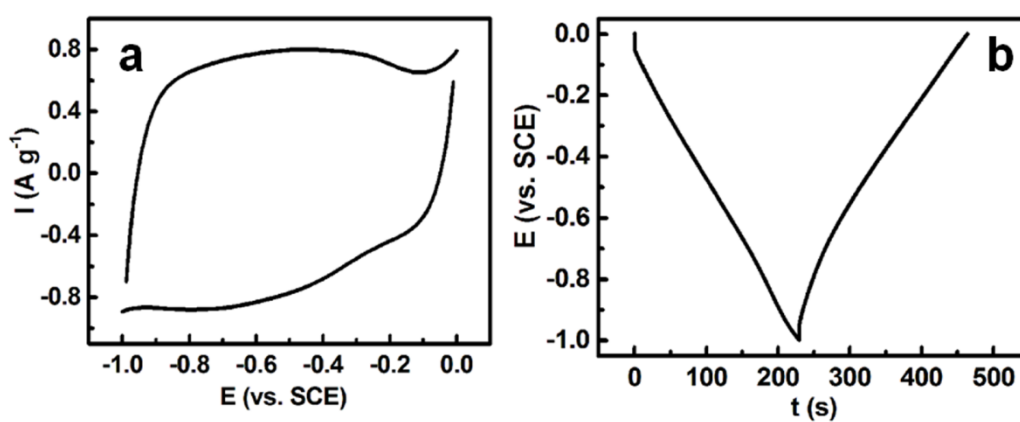

**Fig. S2** (a) CV curves and (b) constant-current charge-discharge plots of the AC electrode

As demonstrated in Fig. S2a, near rectangular shape of the CV are observed, indicating its typical double-layer electric capacitance. In addition, the SC of the AC electrode is calculated as  $\sim 118 \text{ F g}^{-1}$  at a current density of  $0.5 \text{ A g}^{-1}$ , as shown in Fig. S2b.

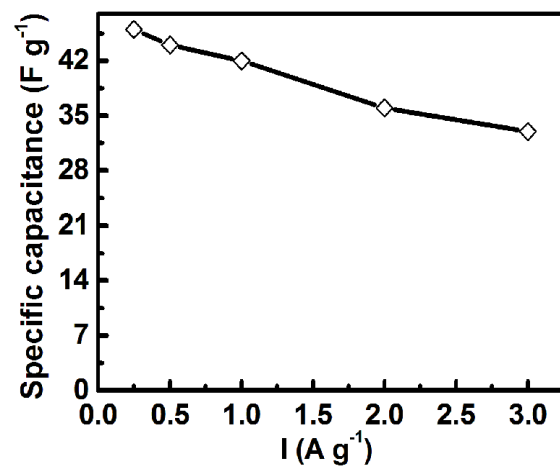

**Fig. S3** Calculated SCs as a function of the current density for the AC/Co<sub>3</sub>O<sub>4</sub> NSs-rGO asymmetric EC
